# Supplementary material
Source: PubMed Central journal article supplement (PMC8718213)
Supplement: NIHMS1703772-supplement-Suppl_material.pdf [file NIHMS1703772-supplement-Suppl_material.pdf]

# Predicting Ovarian Cancer Patients' Clinical Response to Platinum-based Chemotherapy by their Tumor Proteomic Signatures

*Kun-Hsing Yu<sup>1,2</sup>, Douglas A. Levine<sup>3</sup>, Hui Zhang<sup>4</sup>, Daniel W. Chan<sup>4</sup>, Zhen Zhang<sup>4</sup>, and Michael Snyder<sup>1,\*</sup>*

<sup>1</sup> Department of Genetics, Stanford University School of Medicine, Stanford, CA

<sup>2</sup> Biomedical Informatics Training Program, Stanford University School of Medicine, Stanford, CA

<sup>3</sup> Department of Surgery, Memorial Sloan Kettering Cancer Center, New York, NY

<sup>4</sup> Department of Pathology, Johns Hopkins Medical Institutions, Baltimore, MD

\* Correspondence should be addressed to: [mpsnyder@stanford.edu](mailto:mpsnyder@stanford.edu)

## **Table of Contents:**

|                    |     |
|--------------------|-----|
| Figure S-1         | S-2 |
| Tables S-1 and S-2 | S-3 |

Figure S-1

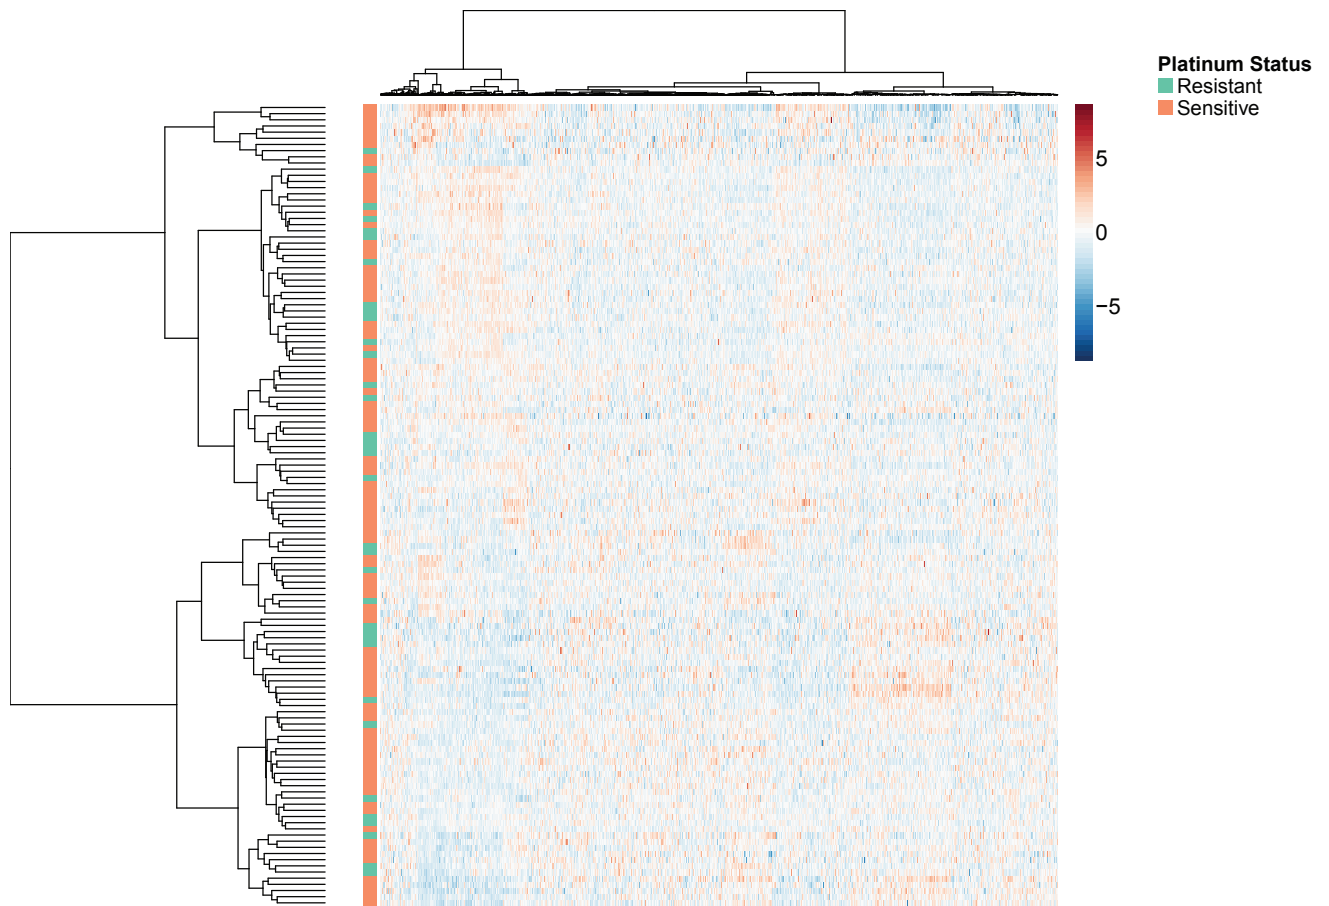

Figure S-1. Global proteomic profiles of ovarian serous carcinoma patients. This heatmap shows the log-transformed protein abundance. Each row indicates the proteomic profile of a patient, and each column represents the expression level of a protein. Although some patients with the same platinum response status had similar proteomic profiles, the global proteomic patterns did not predict platinum resistance.

**Table S-1.** Clinical Profiles of the Participating Ovarian Serous Carcinoma Patients

| Patient Barcode | Platinum Free Interval (months) | Platinum Status | Anatomic Organ Subdivision | Chemotherapy | Days to Initial Pathologic Diagnosis | Histological Type         | Informed Consent Verified | Pretreatment History | Race  | Tumor Stage |
|-----------------|---------------------------------|-----------------|----------------------------|--------------|--------------------------------------|---------------------------|---------------------------|----------------------|-------|-------------|
| TCGA-09-2056    | 7.6                             | Sensitive       | Bilateral                  | YES          | 0                                    | Serous Cystadenocarcinoma | YES                       | NO                   | WHITE | IIIC        |
| TCGA-13-1404    | 43.5                            | Sensitive       | Bilateral                  | YES          | 0                                    | Serous Cystadenocarcinoma | YES                       | NO                   | WHITE | IIIC        |
| TCGA-13-1409    | 17.53                           | Sensitive       | [Not Available]            | YES          | 0                                    | Serous Cystadenocarcinoma | YES                       | NO                   | WHITE | IIIC        |
| TCGA-13-1410    | 6.37                            | Sensitive       | Bilateral                  | YES          | 0                                    | Serous Cystadenocarcinoma | YES                       | NO                   | WHITE | IV          |
| TCGA-13-1482    | 14.8                            | Sensitive       | [Not Available]            | YES          | 0                                    | Serous Cystadenocarcinoma | YES                       | NO                   | WHITE | IV          |
| TCGA-13-1483    | 1.9                             | Resistant       | [Not Available]            | YES          | 0                                    | Serous Cystadenocarcinoma | YES                       | NO                   | WHITE | IIIC        |
| TCGA-13-1484    | 10.1                            | Sensitive       | [Not Available]            | YES          | 0                                    | Serous Cystadenocarcinoma | YES                       | NO                   | WHITE | IIIC        |
| TCGA-13-1485    | 0.7                             | Resistant       | Bilateral                  | YES          | 0                                    | Serous Cystadenocarcinoma | YES                       | NO                   | WHITE | IV          |
| TCGA-13-1487    | 6.7                             | Sensitive       | [Not Available]            | YES          | 0                                    | Serous Cystadenocarcinoma | YES                       | NO                   | WHITE | IV          |
| TCGA-13-1488    | 6                               | Sensitive       | Bilateral                  | YES          | 0                                    | Serous Cystadenocarcinoma | YES                       | NO                   | WHITE | IV          |
| TCGA-13-1489    | 17.5                            | Sensitive       | Bilateral                  | YES          | 0                                    | Serous Cystadenocarcinoma | YES                       | NO                   | WHITE | IIIC        |
| TCGA-13-1492    | 117.67                          | Sensitive       | [Not Available]            | YES          | 0                                    | Serous Cystadenocarcinoma | YES                       | NO                   | WHITE | IIIC        |
| TCGA-13-1494    | 16.8                            | Sensitive       | Bilateral                  | YES          | 0                                    | Serous Cystadenocarcinoma | YES                       | NO                   | WHITE | IV          |
| TCGA-13-1495    | 27.5                            | Sensitive       | Bilateral                  | YES          | 0                                    | Serous Cystadenocarcinoma | YES                       | NO                   | WHITE | IIIC        |
| TCGA-13-1497    | 20.6                            | Sensitive       | [Not Available]            | YES          | 0                                    | Serous Cystadenocarcinoma | YES                       | NO                   | WHITE | IIIC        |
| TCGA-13-1499    | 13                              | Sensitive       | [Not Available]            | YES          | 0                                    | Serous Cystadenocarcinoma | YES                       | NO                   | WHITE | IIIC        |
| TCGA-13-1500    | 1                               | Resistant       | Bilateral                  | YES          | 0                                    | Serous Cystadenocarcinoma | YES                       | NO                   | WHITE | IIIC        |
| TCGA-13-1501    | 6.9                             | Sensitive       | Bilateral                  | YES          | 0                                    | Serous Cystadenocarcinoma | YES                       | NO                   | WHITE | IV          |
| TCGA-13-1504    | 8.77                            | Sensitive       | Bilateral                  | YES          | 0                                    | Serous Cystadenocarcinoma | YES                       | NO                   | WHITE | IIIC        |
| TCGA-13-1507    | 5.47                            | Resistant       | Bilateral                  | YES          | 0                                    | Serous Cystadenocarcinoma | YES                       | NO                   | WHITE | IIIC        |
| TCGA-13-1511    | 8.97                            | Sensitive       | Bilateral                  | YES          | 0                                    | Serous Cystadenocarcinoma | YES                       | NO                   | ASIAN | IV          |
| TCGA-13-2059    | 28.23                           | Sensitive       | Bilateral                  | YES          | 0                                    | Serous Cystadenocarcinoma | YES                       | NO                   | WHITE | IIIC        |

|              |       |           |           |     |   |                           |     |    |                           |      |
|--------------|-------|-----------|-----------|-----|---|---------------------------|-----|----|---------------------------|------|
| TCGA-13-2060 | 44.29 | Sensitive | Bilateral | YES | 0 | Serous Cystadenocarcinoma | YES | NO | WHITE                     | IV   |
| TCGA-13-2061 | 60.43 | Sensitive | Bilateral | YES | 0 | Serous Cystadenocarcinoma | YES | NO | WHITE                     | IIIC |
| TCGA-13-2065 | 26.83 | Sensitive | Bilateral | YES | 0 | Serous Cystadenocarcinoma | YES | NO | BLACK OR AFRICAN AMERICAN | IIIC |
| TCGA-13-2066 | 28.63 | Sensitive | Bilateral | YES | 0 | Serous Cystadenocarcinoma | YES | NO | WHITE                     | IV   |
| TCGA-13-2071 | 5.87  | Resistant | Bilateral | YES | 0 | Serous Cystadenocarcinoma | YES | NO | WHITE                     | IV   |
| TCGA-23-1121 | 70.3  | Sensitive | Left      | YES | 0 | Serous Cystadenocarcinoma | YES | NO | [Not Available]           | IIIC |
| TCGA-23-1122 | 6.7   | Sensitive | Left      | YES | 0 | Serous Cystadenocarcinoma | YES | NO | WHITE                     | IIIC |
| TCGA-23-1124 | 14.7  | Sensitive | Left      | YES | 0 | Serous Cystadenocarcinoma | YES | NO | WHITE                     | IIIC |
| TCGA-24-1103 | 17.96 | Sensitive | Bilateral | YES | 0 | Serous Cystadenocarcinoma | YES | NO | BLACK OR AFRICAN AMERICAN | IIIC |
| TCGA-24-1104 | 25.61 | Sensitive | Left      | YES | 0 | Serous Cystadenocarcinoma | YES | NO | WHITE                     | IV   |
| TCGA-24-1105 | 9.48  | Sensitive | Bilateral | YES | 0 | Serous Cystadenocarcinoma | YES | NO | WHITE                     | IIIC |
| TCGA-24-1416 | 5     | Resistant | Bilateral | YES | 0 | Serous Cystadenocarcinoma | YES | NO | WHITE                     | IV   |
| TCGA-24-1428 | 10.6  | Sensitive | Left      | YES | 0 | Serous Cystadenocarcinoma | YES | NO | WHITE                     | IIIC |
| TCGA-24-1430 | 11.2  | Sensitive | Bilateral | YES | 0 | Serous Cystadenocarcinoma | YES | NO | WHITE                     | IIIC |
| TCGA-24-1431 | 1.7   | Resistant | Bilateral | YES | 0 | Serous Cystadenocarcinoma | YES | NO | WHITE                     | IIIC |
| TCGA-24-1435 | 11.7  | Sensitive | Bilateral | YES | 0 | Serous Cystadenocarcinoma | YES | NO | WHITE                     | IIIC |
| TCGA-24-1464 | 5.2   | Resistant | Left      | YES | 0 | Serous Cystadenocarcinoma | YES | NO | WHITE                     | IIIC |
| TCGA-24-1466 | 11.4  | Sensitive | Bilateral | YES | 0 | Serous Cystadenocarcinoma | YES | NO | WHITE                     | IIIC |
| TCGA-24-1467 | 97.5  | Sensitive | Right     | YES | 0 | Serous Cystadenocarcinoma | YES | NO | WHITE                     | IIIC |
| TCGA-24-1474 | 6.9   | Sensitive | Left      | YES | 0 | Serous Cystadenocarcinoma | YES | NO | BLACK OR AFRICAN AMERICAN | IIIC |
| TCGA-24-1544 | 14.5  | Sensitive | Bilateral | YES | 0 | Serous Cystadenocarcinoma | YES | NO | BLACK OR AFRICAN AMERICAN | IIIC |
| TCGA-24-1545 | 19    | Sensitive | Bilateral | YES | 0 | Serous Cystadenocarcinoma | YES | NO | WHITE                     | IIIC |
| TCGA-24-1548 | 2.8   | Resistant | Bilateral | YES | 0 | Serous Cystadenocarcinoma | YES | NO | WHITE                     | IIIC |
| TCGA-24-1550 | 23.6  | Sensitive | Left      | YES | 0 | Serous Cystadenocarcinoma | YES | NO | WHITE                     | IIIC |
| TCGA-24-1551 | 20.6  | Sensitive | Bilateral | YES | 0 | Serous Cystadenocarcinoma | YES | NO | WHITE                     | IIIC |
| TCGA-24-1552 | 4.11  | Resistant | Left      | YES | 0 | Serous Cystadenocarcinoma | YES | NO | WHITE                     | IIIC |
| TCGA-24-1553 | 13.1  | Sensitive | Bilateral | YES | 0 | Serous Cystadenocarcinoma | YES | NO | WHITE                     | IIIB |
| TCGA-24-1557 | 5.5   | Resistant | Bilateral | YES | 0 | Serous Cystadenocarcinoma | YES | NO | WHITE                     | IIIC |
| TCGA-24-1558 | 0.8   | Resistant | Bilateral | YES | 0 | Serous Cystadenocarcinoma | YES | NO | WHITE                     | IIIC |
| TCGA-24-1562 | 2.5   | Resistant | Bilateral | YES | 0 | Serous Cystadenocarcinoma | YES | NO | WHITE                     | IIIC |
| TCGA-24-1563 | 8.3   | Sensitive | Left      | YES | 0 | Serous Cystadenocarcinoma | YES | NO | BLACK OR AFRICAN AMERICAN | IIIC |
| TCGA-24-1565 | 0.7   | Resistant | Bilateral | YES | 0 | Serous Cystadenocarcinoma | YES | NO | WHITE                     | IIIC |
| TCGA-24-1920 | 16.27 | Sensitive | Right     | YES | 0 | Serous Cystadenocarcinoma | YES | NO | WHITE                     | IIIC |
| TCGA-24-1923 | 3.52  | Resistant | Bilateral | YES | 0 | Serous Cystadenocarcinoma | YES | NO | WHITE                     | IIIC |
| TCGA-24-1927 | 5.23  | Resistant | Bilateral | YES | 0 | Serous Cystadenocarcinoma | YES | NO | WHITE                     | IIIC |



|              |       |           |                 |     |   |                           |     |    |                                  |      |
|--------------|-------|-----------|-----------------|-----|---|---------------------------|-----|----|----------------------------------|------|
| TCGA-24-2024 | 9.8   | Sensitive | Bilateral       | YES | 0 | Serous Cystadenocarcinoma | YES | NO | BLACK OR AFRICAN AMERICAN        | IIIC |
| TCGA-24-2027 | 11.63 | Sensitive | Bilateral       | YES | 0 | Serous Cystadenocarcinoma | YES | NO | WHITE                            | IV   |
| TCGA-24-2030 | 16.95 | Sensitive | Left            | YES | 0 | Serous Cystadenocarcinoma | YES | NO | WHITE                            | IIIC |
| TCGA-24-2033 | 3.77  | Resistant | Bilateral       | YES | 0 | Serous Cystadenocarcinoma | YES | NO | WHITE                            | IIIC |
| TCGA-24-2260 | 17.37 | Sensitive | Bilateral       | YES | 0 | Serous Cystadenocarcinoma | YES | NO | WHITE                            | IIIB |
| TCGA-24-2267 | 9.77  | Sensitive | Bilateral       | YES | 0 | Serous Cystadenocarcinoma | YES | NO | WHITE                            | IIB  |
| TCGA-24-2289 | 12.52 | Sensitive | Bilateral       | YES | 0 | Serous Cystadenocarcinoma | YES | NO | WHITE                            | IV   |
| TCGA-24-2290 | 6.66  | Sensitive | [Not Available] | YES | 0 | Serous Cystadenocarcinoma | YES | NO | WHITE                            | IIIC |
| TCGA-24-2295 | 4.93  | Resistant | Right           | YES | 0 | Serous Cystadenocarcinoma | YES | NO | WHITE                            | IIIC |
| TCGA-24-2298 | 8.37  | Sensitive | Bilateral       | YES | 0 | Serous Cystadenocarcinoma | YES | NO | WHITE                            | IIIC |
| TCGA-25-1313 | 8     | Sensitive | Bilateral       | YES | 0 | Serous Cystadenocarcinoma | YES | NO | WHITE                            | IV   |
| TCGA-25-1316 | 1.9   | Resistant | Right           | YES | 0 | Serous Cystadenocarcinoma | YES | NO | WHITE                            | IIIC |
| TCGA-25-1318 | 2.1   | Resistant | Bilateral       | YES | 0 | Serous Cystadenocarcinoma | YES | NO | WHITE                            | IIIC |
| TCGA-25-1320 | 8     | Sensitive | Bilateral       | YES | 0 | Serous Cystadenocarcinoma | YES | NO | WHITE                            | IIIC |
| TCGA-25-1321 | 9     | Sensitive | Bilateral       | YES | 0 | Serous Cystadenocarcinoma | YES | NO | WHITE                            | IIIC |
| TCGA-25-1323 | 7.9   | Sensitive | Bilateral       | YES | 0 | Serous Cystadenocarcinoma | YES | NO | WHITE                            | IIIC |
| TCGA-25-1623 | 6.7   | Sensitive | Bilateral       | YES | 0 | Serous Cystadenocarcinoma | YES | NO | WHITE                            | IV   |
| TCGA-25-1628 | 3.5   | Resistant | [Not Available] | YES | 0 | Serous Cystadenocarcinoma | YES | NO | WHITE                            | IIIC |
| TCGA-25-1635 | 12.5  | Sensitive | Bilateral       | YES | 0 | Serous Cystadenocarcinoma | YES | NO | WHITE                            | IIIC |
| TCGA-25-2399 | 1.9   | Resistant | Bilateral       | YES | 0 | Serous Cystadenocarcinoma | YES | NO | WHITE                            | IIIC |
| TCGA-25-2400 | 12.85 | Sensitive | Bilateral       | YES | 0 | Serous Cystadenocarcinoma | YES | NO | WHITE                            | IIIC |
| TCGA-25-2404 | 9.9   | Sensitive | Bilateral       | YES | 0 | Serous Cystadenocarcinoma | YES | NO | AMERICAN INDIAN OR ALASKA NATIVE | IIIC |
| TCGA-25-2409 | 3.9   | Resistant | Bilateral       | YES | 0 | Serous Cystadenocarcinoma | YES | NO | WHITE                            | IV   |
| TCGA-29-1693 | 16.4  | Sensitive | Left            | YES | 0 | Serous Cystadenocarcinoma | YES | NO | WHITE                            | IIIC |
| TCGA-29-1696 | 5.6   | Resistant | Right           | YES | 0 | Serous Cystadenocarcinoma | YES | NO | WHITE                            | IIIC |
| TCGA-29-1697 | 10.4  | Sensitive | Bilateral       | YES | 0 | Serous Cystadenocarcinoma | YES | NO | WHITE                            | IIIC |
| TCGA-29-1698 | -1.8  | Resistant | Bilateral       | YES | 0 | Serous Cystadenocarcinoma | YES | NO | BLACK OR AFRICAN AMERICAN        | IIIC |
| TCGA-29-1702 | 2.9   | Resistant | Right           | YES | 0 | Serous Cystadenocarcinoma | YES | NO | WHITE                            | IIIC |
| TCGA-29-1705 | 3.71  | Resistant | Bilateral       | YES | 0 | Serous Cystadenocarcinoma | YES | NO | WHITE                            | IIIC |
| TCGA-29-1710 | 8.77  | Sensitive | Bilateral       | YES | 0 | Serous Cystadenocarcinoma | YES | NO | WHITE                            | IIIC |
| TCGA-29-1711 | 30.1  | Sensitive | Bilateral       | YES | 0 | Serous Cystadenocarcinoma | YES | NO | BLACK OR AFRICAN AMERICAN        | IIIC |
| TCGA-29-1762 | 40.6  | Sensitive | Bilateral       | YES | 0 | Serous Cystadenocarcinoma | YES | NO | WHITE                            | IV   |
| TCGA-29-1763 | 10.8  | Sensitive | Bilateral       | YES | 0 | Serous Cystadenocarcinoma | YES | NO | BLACK OR AFRICAN AMERICAN        | IIC  |
| TCGA-29-1766 | 15.9  | Sensitive | Right           | YES | 0 | Serous Cystadenocarcinoma | YES | NO | WHITE                            | IIIC |
| TCGA-29-1768 | 14.6  | Sensitive | Bilateral       | YES | 0 | Serous Cystadenocarcinoma | YES | NO | WHITE                            | IV   |

|              |       |           |                 |     |   |                           |     |    |                 |      |
|--------------|-------|-----------|-----------------|-----|---|---------------------------|-----|----|-----------------|------|
| TCGA-29-1769 | 18    | Sensitive | Bilateral       | YES | 0 | Serous Cystadenocarcinoma | YES | NO | WHITE           | IIIC |
| TCGA-29-1770 | 7.9   | Sensitive | Bilateral       | YES | 0 | Serous Cystadenocarcinoma | YES | NO | WHITE           | IIIC |
| TCGA-29-1771 | 14.9  | Sensitive | Bilateral       | YES | 0 | Serous Cystadenocarcinoma | YES | NO | WHITE           | IIIC |
| TCGA-29-1774 | 6.5   | Sensitive | Bilateral       | YES | 0 | Serous Cystadenocarcinoma | YES | NO | WHITE           | IIIC |
| TCGA-29-1775 | 5.7   | Resistant | Bilateral       | YES | 0 | Serous Cystadenocarcinoma | YES | NO | WHITE           | IIIC |
| TCGA-29-1785 | 10.4  | Sensitive | Right           | YES | 0 | Serous Cystadenocarcinoma | YES | NO | WHITE           | IIIC |
| TCGA-29-2414 | 13.73 | Sensitive | Left            | YES | 0 | Serous Cystadenocarcinoma | YES | NO | WHITE           | IIIC |
| TCGA-29-2431 | 27.4  | Sensitive | Bilateral       | YES | 0 | Serous Cystadenocarcinoma | YES | NO | WHITE           | IIIC |
| TCGA-29-2432 | 0.53  | Resistant | Bilateral       | YES | 0 | Serous Cystadenocarcinoma | YES | NO | WHITE           | IIIC |
| TCGA-30-1866 | 5.2   | Resistant | Bilateral       | YES | 0 | Serous Cystadenocarcinoma | YES | NO | WHITE           | IV   |
| TCGA-30-1891 | 1.3   | Resistant | Bilateral       | YES | 0 | Serous Cystadenocarcinoma | YES | NO | WHITE           | IIIC |
| TCGA-36-1570 | 8     | Sensitive | Bilateral       | YES | 0 | Serous Cystadenocarcinoma | YES | NO | WHITE           | IIIC |
| TCGA-36-1571 | 6.6   | Sensitive | Bilateral       | YES | 0 | Serous Cystadenocarcinoma | YES | NO | WHITE           | IIIB |
| TCGA-36-1576 | 19.5  | Sensitive | [Not Available] | YES | 0 | Serous Cystadenocarcinoma | YES | NO | [Not Available] | IIIC |
| TCGA-36-1577 | 23.3  | Sensitive | Bilateral       | YES | 0 | Serous Cystadenocarcinoma | YES | NO | ASIAN           | IIC  |
| TCGA-36-1578 | 3.1   | Resistant | [Not Available] | YES | 0 | Serous Cystadenocarcinoma | YES | NO | ASIAN           | IV   |
| TCGA-36-1580 | 3     | Resistant | [Not Available] | YES | 0 | Serous Cystadenocarcinoma | YES | NO | [Not Available] | IIIC |
| TCGA-36-1581 | 18.5  | Sensitive | Left            | YES | 0 | Serous Cystadenocarcinoma | YES | NO | WHITE           | IIC  |
| TCGA-36-2529 | 14.37 | Sensitive | Bilateral       | YES | 0 | Serous Cystadenocarcinoma | YES | NO | [Not Available] | IIIC |
| TCGA-36-2530 | 16.5  | Sensitive | Bilateral       | YES | 0 | Serous Cystadenocarcinoma | YES | NO | ASIAN           | IIIC |
| TCGA-36-2534 | 7.63  | Sensitive | Right           | YES | 0 | Serous Cystadenocarcinoma | YES | NO | WHITE           | IIIC |
| TCGA-36-2537 | 10.2  | Sensitive | Bilateral       | YES | 0 | Serous Cystadenocarcinoma | YES | NO | [Not Available] | IIIC |
| TCGA-36-2542 | 16.83 | Sensitive | Bilateral       | YES | 0 | Serous Cystadenocarcinoma | YES | NO | ASIAN           | IIIB |
| TCGA-36-2544 | 6.57  | Sensitive | Bilateral       | YES | 0 | Serous Cystadenocarcinoma | YES | NO | [Not Available] | IIIC |
| TCGA-36-2545 | 13.73 | Sensitive | Bilateral       | YES | 0 | Serous Cystadenocarcinoma | YES | NO | [Not Available] | IIIA |
| TCGA-42-2588 | 0.73  | Resistant | Bilateral       | YES | 0 | Serous Cystadenocarcinoma | YES | NO | WHITE           | IV   |
| TCGA-61-1727 | 13.7  | Sensitive | Right           | YES | 0 | Serous Cystadenocarcinoma | YES | NO | WHITE           | IC   |
| TCGA-61-1741 | 10.1  | Sensitive | Bilateral       | YES | 0 | Serous Cystadenocarcinoma | YES | NO | WHITE           | IIIB |
| TCGA-61-1907 | 19.1  | Sensitive | Bilateral       | YES | 0 | Serous Cystadenocarcinoma | YES | NO | WHITE           | IIIC |
| TCGA-61-1910 | 31.7  | Sensitive | Bilateral       | YES | 0 | Serous Cystadenocarcinoma | YES | NO | WHITE           | IIC  |
| TCGA-61-1911 | 23    | Sensitive | Left            | YES | 0 | Serous Cystadenocarcinoma | YES | NO | WHITE           | IIA  |
| TCGA-61-1914 | 48.6  | Sensitive | Bilateral       | YES | 0 | Serous Cystadenocarcinoma | YES | NO | [Not Available] | IIIC |
| TCGA-61-1915 | 63    | Sensitive | Bilateral       | YES | 0 | Serous Cystadenocarcinoma | YES | NO | WHITE           | IIC  |
| TCGA-61-1918 | 8.7   | Sensitive | Bilateral       | YES | 0 | Serous Cystadenocarcinoma | YES | NO | WHITE           | IV   |
| TCGA-61-2008 | 22    | Sensitive | Bilateral       | YES | 0 | Serous Cystadenocarcinoma | YES | NO | ASIAN           | IIC  |

|              |      |           |           |     |   |                           |     |    |       |      |
|--------------|------|-----------|-----------|-----|---|---------------------------|-----|----|-------|------|
| TCGA-61-2094 | 66.2 | Sensitive | Bilateral | YES | 0 | Serous Cystadenocarcinoma | YES | NO | WHITE | IIIC |
| TCGA-61-2096 | 11.4 | Sensitive | Right     | YES | 0 | Serous Cystadenocarcinoma | YES | NO | WHITE | IC   |
| TCGA-61-2612 | 0.93 | Resistant | Bilateral | YES | 0 | Serous Cystadenocarcinoma | YES | NO | WHITE | IIIC |

**Table S-2.** Proteins with significant abundance differences between platinum sensitive and platinum resistant patients.

| <b>Protein Name</b> | <b>Mean Log2-<br/>Abundance in<br/>Platinum Resistant<br/>Patients</b> | <b>Mean Log2-<br/>Abundance in<br/>Platinum Sensitive<br/>Patients</b> | <b>P-value</b> |
|---------------------|------------------------------------------------------------------------|------------------------------------------------------------------------|----------------|
| RANBP1              | -0.22656985                                                            | 0.017876518                                                            | 0.0000902      |
| TPMT                | -0.176599179                                                           | 0.104756336                                                            | 0.001036257    |
| XP_003403878        | -0.501894751                                                           | -0.027330854                                                           | 0.001495694    |
| LDHAL6A             | 0.125195932                                                            | -0.128106934                                                           | 0.00169655     |
| SARS2               | 0.113472727                                                            | -0.197092395                                                           | 0.002544036    |
| XP_001716274        | -0.634090967                                                           | -0.215157026                                                           | 0.002970108    |
| KRT19               | 0.084616757                                                            | -0.229646258                                                           | 0.003125997    |
| KRT15               | 0.018890798                                                            | -0.30724076                                                            | 0.005148307    |
| KRT13               | 0.057185437                                                            | -0.31700448                                                            | 0.005232576    |
| NDUFA4              | 0.069992474                                                            | -0.177570002                                                           | 0.005318089    |
| RDH13               | 0.224849399                                                            | -0.024663431                                                           | 0.006761351    |
| BCAT1               | -1.523569674                                                           | -0.891530395                                                           | 0.006869059    |
| ACTN4               | 0.147854342                                                            | -0.136281477                                                           | 0.006869059    |
| XP_003403926        | -0.34088437                                                            | -0.054526625                                                           | 0.006869059    |
| NP_001156363        | -0.048293032                                                           | 0.302021514                                                            | 0.007548297    |
| KRT20               | 0.090482799                                                            | -0.231880003                                                           | 0.007910001    |

|              |              |              |             |
|--------------|--------------|--------------|-------------|
| XP_003403669 | -0.403262397 | -0.085636809 | 0.008680312 |
| BCAT1        | -1.591362142 | -0.95863972  | 0.00909006  |
| KRT4         | 0.107627698  | -0.281399794 | 0.009516989 |
| MT1G         | -0.090150808 | -0.64065696  | 0.009516989 |
| MT1X         | -0.090152833 | -0.636783401 | 0.009663222 |
| MT2A         | -0.082340334 | -0.609471008 | 0.009663222 |
| IPLL5        | -0.571637757 | -0.206650432 | 0.012291173 |
| MT1M         | -0.140335909 | -0.684681433 | 0.01509093  |
